# Supplementary material for: Signs of early cellular dysfunction in multiple system atrophy
Source: PubMed Central journal article supplement (PMC7891639; doi:10.1111/nan.12661), 2020-09-17
Supplement: NAN-47-268-s001.pdf [file NAN-47-268-s001.pdf]

## Signs of early cellular dysfunction in multiple system atrophy

Marcos Herrera-Vaquero<sup>1</sup>, Antonio Heras-Garvin<sup>1</sup>, Florian Krismer<sup>1</sup>, Roxana Deleanu<sup>2</sup>, Sylvia

Boesch<sup>1</sup>, Gregor K. Wenning<sup>1</sup>, Nadia Stefanova<sup>1\*</sup>

### SUPPLEMENTARY DATA

| Case    | Diagnostic certainty | Age at skin biopsy | Sex | Age at symptom onset | UMSARS | Hoehn & Yahr Parkinson's Stage | Diagnosis |
|---------|----------------------|--------------------|-----|----------------------|--------|--------------------------------|-----------|
| MSA1    | Probable MSA         | 54                 | F   | 46                   | 59     | 4                              | MSA-P     |
| MSA2    | Probable MSA         | 54                 | M   | 52                   | 31     | 3                              | MSA-P     |
| Control | -                    | 53                 | F   | -                    | -      | -                              | -         |

*Supplementary table 1. Demographic data*

| Human gene name | TaqMan gene expression assay |
|-----------------|------------------------------|
| CDH1            | Hs01023895_m1                |
| GAPDH           | Hs02786624_g1                |
| KLF4            | Hs00358836_m1                |
| LIN28A          | Hs00702808_s1                |
| MYC             | Hs00153408_m1                |
| NANOG           | Hs02387400_g1                |
| POU5F1 (OCT4)   | Hs04260367_gH                |
| SEV             | Mr04269880_mr                |
| SEV-CMYC        | Mr04269876_mr                |
| SEV-KOS         | Mr04421257_mr                |
| SEV-KLF4        | Mr04421256_mr                |
| SOX2            | Hs01053049_s1                |
| SNCA            | Hs00240906_m1                |

*Supplementary table 2: TaqMan Gene Expression Assays used in the study.*

| Name                            | Produced<br>in | Company                       | Cat No   | Dilution |
|---------------------------------|----------------|-------------------------------|----------|----------|
| Oct3/4                          | mouse          | Santa Cruz                    | Sc-5279  | 1:100    |
| Nanog                           | rabbit         | Abcam                         | Ab109250 | 1:200    |
| Sox 2                           | rabbit         | Abcam                         | Ab97959  | 1:200    |
| Pax6                            | mouse          | Santa Cruz                    | Sc-32766 | 1:100    |
| Gata4                           | mouse          | Santa Cruz                    | Sc-25310 | 1:100    |
| SM22 $\alpha$                   | rabbit         | Abcam                         | Ab14106  | 1:200    |
| hVE Cadherin                    | goat           | R&D                           | AF938    | 1:200    |
| Anti SeV                        | rabbit         | MBL International Corporation | PD029    | 1:100    |
| CD56 (NCAM-1)                   | mouse          | Invitrogen                    | MA106801 | 1:100    |
| Olig-2                          | rabbit         | Millipore                     | AB9610   | 1:500    |
| $\beta$ -III-tubulin            | rabbit         | Abcam                         | Ab18207  | 1:1000   |
| GFAP                            | rat            | Thermo Fisher                 | 13-0300  | 1:500    |
| Cleaved Caspase 3               | rabbit         | Cell Signaling                | 9661     | 1:100    |
| Tom20                           | rabbit         | Abcam                         | Ab186735 | 1:250    |
| Alpha-synuclein                 | mouse          | Genetex                       | GTX21904 | 1:200    |
| Phospho S129<br>alpha-synuclein | rabbit         | Abcam                         | Ab51253  | 1:1000   |
| Alexa 488 anti-<br>mouse IgG    | goat           | Thermo Fisher Scientific      | A11029   | 1:800    |
| Alexa 488 anti-<br>goat IgG     | donkey         | Thermo Fisher Scientific      | A11055   | 1:800    |
| Alexa 488 anti-<br>rabbit IgG   | goat           | Thermo Fisher Scientific      | A11034   | 1:800    |

|                           |      |                          |        |       |
|---------------------------|------|--------------------------|--------|-------|
| Alexa 594 anti-mouse IgG  | goat | Thermo Fisher Scientific | A11005 | 1:800 |
| Alexa 594 anti-rabbit IgG | goat | Thermo Fisher Scientific | A11037 | 1:800 |

*Supplementary table 3: Antibodies used in ICC*

| Name                | Company  | Cat No      | Dilution |
|---------------------|----------|-------------|----------|
| Anti-PSA NCAM-APC   | Miltenyi | 130-093-273 | 1:11     |
| REA Control (S)-APC | Miltenyi | 130-113-434 | 1:11     |

*Supplementary table 4: Antibodies used for FACS.*

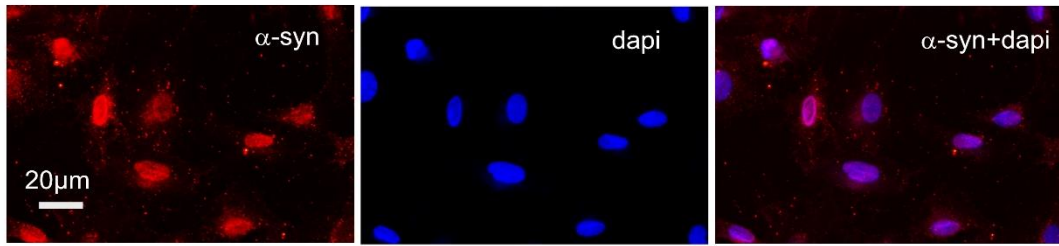

*Supplementary Figure 1. Nuclear translocation of  $\alpha$ -synuclein after exposure of NCAM-positive NPCs derived from a healthy control to oxidative stress (luperox) supporting previous observations by Pinho et al 2019 [44].*
